# Supplementary material for: Accurate, Sensitive, and Rapid Detection of Pseudomonas aeruginosa Based on CRISPR/Cas12b with One Fluid-Handling Step
Source: PubMed Central journal article supplement (PMC9927138; doi:10.1128/spectrum.03523-22), 2023-01-09
Supplement: spectrum.03523-22-s0001.pdf [file spectrum.03523-22-s0001.pdf]

## Supplementary materials for

### Accurate, sensitive, and rapid detection of *Pseudomonas aeruginosa* based on CRISPR/Cas12b with one fluid-handling step

**Table S1.** Strains used in this study.

| Bacteria                            | Strain type (Strain ID)        | No. of strains |
|-------------------------------------|--------------------------------|----------------|
| <i>Pseudomonas aeruginosa</i>       | Reference strain (ATCC 27853)  | 1              |
|                                     | Isolated strain                | 15             |
| <i>Klebsiella pneumoniae</i>        | Reference strain (ATCC 700603) | 1              |
| <i>Klebsiella oxytoca</i>           | Isolated strain                | 1              |
| <i>Klebsiella aerogenes</i>         | Isolated strain                | 1              |
| <i>Staphylococcus aureus</i>        | Reference strain (ATCC 29213)  | 1              |
| <i>Staphylococcus haemolyticus</i>  | Isolated strain                | 1              |
| <i>Staphylococcus succinus</i>      | Isolated strain                | 1              |
| <i>Staphylococcus epidermidis</i>   | Isolated strain                | 1              |
| <i>Acinetobacter baumannii</i>      | Isolated strain                | 1              |
| <i>Acinetobacter pizzeri</i>        | Isolated strain                | 1              |
| <i>Acinetobacter junii</i>          | Isolated strain                | 1              |
| <i>Moraxella catarrhalis</i>        | Isolated strain                | 1              |
| <i>Escherichia coli</i>             | Reference strain (ATCC 25922)  | 1              |
| <i>Mycobacterium tuberculosis</i>   | Reference strain (H37Rv)       | 1              |
| <i>Streptococcus pneumoniae</i>     | Reference strain (ATCC 49619)  | 1              |
| <i>Streptococcus oralis</i>         | Isolated strain                | 1              |
| <i>Streptococcus salivarius</i>     | Reference strain (K12)         | 1              |
| <i>Streptococcus agalactiae</i>     | Isolated strain                | 1              |
| <i>Streptococcus pyogenes</i>       | Reference strain (CGMC 48848)  | 1              |
| <i>Streptococcus mitis</i>          | Isolated strain                | 1              |
| <i>Streptococcus suis</i>           | Reference strain (GZ1)         | 1              |
| <i>Stenotrophomonas maltophilia</i> | Isolated strain                | 1              |
| <i>Nocardia farcinica</i>           | Reference strain (IFM 10152)   | 1              |
| <i>Nocardia cyriacigeorgica</i>     | Reference strain (DSM 40350)   | 1              |
| <i>Corynebacterium striatum</i>     | Reference strain (ATCC 43751)  | 1              |
| <i>Corynebacterium simulans</i>     | Isolated strain                | 1              |
| <i>Corynebacterium propinquum</i>   | Isolated strain                | 1              |
| <i>Corynebacterium aurimucosum</i>  | Isolated strain                | 1              |
| <i>Enterococcus faecalis</i>        | Reference strain (ATCC 29212)  | 1              |
| <i>Aeromonas caviae</i>             | Isolated strain                | 1              |
| <i>Elizabethkingia anophelis</i>    | Isolated strain                | 1              |
| <i>Ralstonia mannitolilytica</i>    | Isolated strain                | 1              |
| <i>Rothia kristinae</i>             | Isolated strain                | 1              |
| <i>Serratia marcescens</i>          | Isolated strain                | 1              |

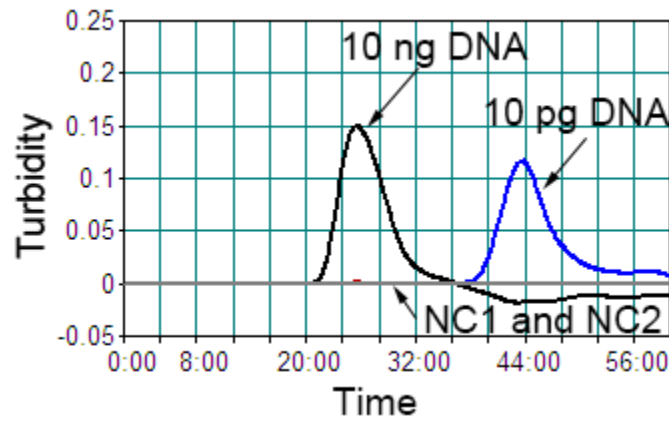

**Figure S1.** Confirmation of LAMP primers. LAMP reaction was conducted at 60°C for 1 h. *P. aeruginosa* ATCC 27853 genomic DNA and DW were used as the templates of the positive control and the negative control, respectively. NC, negative control.
